# Supplementary material for: A new organo-ruthenium substituted tungstotellurate: synthesis, structural characterization and catalytic properties
Source: Royal Society of Chemistry journal article supplement (doi:10.1039/c6nj01914e), 2016-01-01
Supplement: c6nj01914e1.pdf [file c6nj01914e1.pdf]

## Supporting Information

### A New Organo-Ruthenium Substituted Tungstotellurate: Synthesis, Structural Characterization and Catalytic Property

Da-Ming Zheng, Rui-Qiang Wang, Yu Du, Guang-Feng Hou, Li-Xin Wu, Li-Hua Bi

**Table SI.** Selected bond distances (Å) for **Ru-2**.

| <b>Ru-2</b>  |           |              |           |
|--------------|-----------|--------------|-----------|
| W(1) – O(1)  | 1.799(11) | W(2) – O(1)  | 2.106(11) |
| W(1) – O(3)  | 2.028(12) | W(2) – O(2)  | 1.926(12) |
| W(1) – O(4)  | 1.791(12) | W(2) – O(4)  | 2.129(12) |
| W(1) – O(18) | 2.055(12) | W(2) – O(10) | 1.939(12) |
| W(1) – O(20) | 2.281(12) | W(2) – O(17) | 1.745(13) |
| W(1) – O(24) | 1.743(12) | W(2) – O(27) | 1.739(13) |
| W(3) – O(6)  | 1.914(15) | W(4) – O(2)  | 1.931(12) |
| W(3) – O(7)  | 1.891(11) | W(4) – O(5)  | 1.971(13) |
| W(3) – O(10) | 1.916(12) | W(4) – O(9)  | 1.867(12) |
| W(3) – O(21) | 2.337(11) | W(4) – O(11) | 2.348(11) |
| W(3) – O(25) | 1.712(12) | W(4) – O(13) | 1.721(12) |
| W(3) – O(34) | 1.922(13) | W(4) – O(22) | 1.865(14) |
| W(5) – O(7)  | 1.951(10) | W(6) – O(9)  | 1.959(12) |
| W(5) – O(21) | 2.395(11) | W(6) – O(11) | 2.361(12) |
| W(5) – O(23) | 1.915(12) | W(6) – O(16) | 1.727(13) |
| W(5) – O(15) | 1.845(13) | W(6) – O(23) | 1.895(12) |

|             |           |             |           |
|-------------|-----------|-------------|-----------|
| W(5)–O(26)  | 1.877(15) | W(6)–O(30)  | 1.858(15) |
| W(5)–O(33)  | 1.707(13) | W(6)–O(31)  | 1.909(15) |
| W(7)–O(3)   | 1.885(12) | W(8)–O(8)   | 1.834(11) |
| W(7)–O(6)   | 1.907(14) | W(8)–O(11)  | 2.314(13) |
| W(7)–O(15)  | 1.971(13) | W(8)–O(19)  | 1.921(12) |
| W(7)–O(20)  | 2.434(11) | W(8)–O(22)  | 1.964(11) |
| W(7)–O(32)  | 1.925(13) | W(8)–O(28)  | 1.664(16) |
| W(7)–O(35)  | 1.706(14) | W(8)–O(31)  | 2.003(12) |
| W(9)–O(5)   | 1.854(12) | W(10)–O(12) | 1.716(13) |
| W(9)–O(18)  | 1.848(12) | O(14)–W(10) | 1.806(12) |
| W(9)–O(20)  | 2.452(11) | W(10)–O(19) | 1.927(12) |
| W(9)–O(29)  | 1.731(13) | W(10)–O(21) | 2.315(13) |
| W(9)–O(30)  | 1.966(14) | W(10)–O(26) | 2.021(13) |
| W(9)–O(32)  | 1.919(13) | W(10)–O(34) | 1.948(13) |
| Te(1)–O(11) | 1.907(12) | Ru(1)–O(8)  | 2.053(12) |
| Te(1)–O(20) | 1.896(12) | Ru(1)–O(14) | 2.108(13) |
| Te(1)–O(21) | 1.894(11) | Ru(1)–O(24) | 2.094(12) |
| Ru(1)–C(1)  | 2.12(3)   | Ru(1)–C(4)  | 2.10(3)   |
| Ru(1)–C(2)  | 2.13(2)   | Ru(1)–C(5)  | 2.12(4)   |
| Ru(1)–C(3)  | 2.12(3)   | Ru(1)–C(6)  | 2.11(3)   |

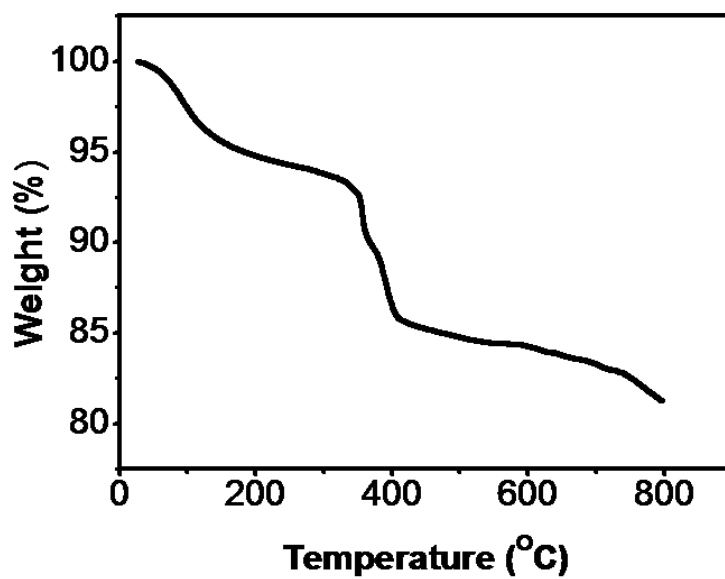

Fig. S1. TGA curve of Ru-2.

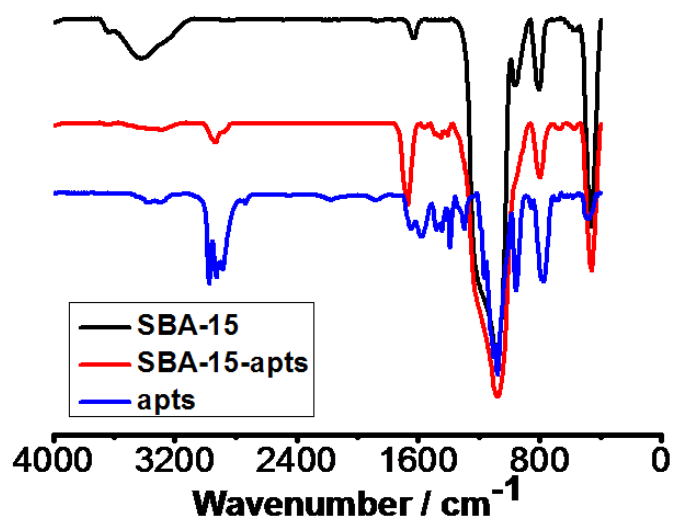

Fig. S2. IR spectra of SBA-15, apt and SBA-15-apt
